# Supplementary material for: CD73 promotes tumor metastasis by modulating RICS/RhoA signaling and EMT in gastric cancer
Source: PubMed Central journal article supplement (PMC7089986; doi:10.1038/s41419-020-2403-6), 2020-03-23
Supplement: 41419_2020_2403_MOESM10_ESM.pdf [file 41419_2020_2403_MOESM10_ESM.pdf]

Please complete the table below to indicate the contributions of all named authors to the figures.

Figure 1:

|  |
|--|
|  |
|--|

Figure 2:

|  |
|--|
|  |
|--|

Figure 3:

|  |
|--|
|  |
|--|

Figure 4:

|  |
|--|
|  |
|--|

Figure 5:

|  |
|--|
|  |
|--|

Figure 6:

|  |
|--|
|  |
|--|

Signed for and on behalf of the Author(s):

Liu Hao

Print Name:

|  |
|--|
|  |
|--|

Date:

|  |
|--|
|  |
|--|
